# Supplementary material for: Heterologous Expression of Pseudouridimycin and Description of the Corresponding Minimal Biosynthetic Gene Cluster
Source: PubMed Central journal article supplement (PMC7835738; doi:10.3390/molecules26020510), 2021-01-19
Supplement: molecules-26-00510-s001.pdf [file molecules-26-00510-s001.pdf]

# Supporting Information

## Heterologous expression of pseudouridimycin and description of the corresponding minimal biosynthetic gene cluster

Nils Böhringer<sup>1,2</sup>, Maria A. Patras<sup>3</sup> and Till F. Schäberle<sup>1,2,3,\*</sup>

<sup>1</sup> Institute for Insect Biotechnology, Justus-Liebig-University of Giessen, 35392 Giessen, Germany; nils.boehringer@agrار.uni-giessen.de

<sup>2</sup> German Center for Infection Research (DZIF), Partner Site Giessen-Marburg-Langen, Giessen, Germany

<sup>3</sup> Fraunhofer Institute for Molecular Biology and Applied Ecology (IME), Branch for Bioresources, 35392 Giessen, Germany; Maria.Patras@ime.fraunhofer.de

\* Correspondence: till.f.schaerberle@agrار.uni-giessen.de

### Content

**Figure S1: Cloning procedure for construction of pCAP03-PUM and pCAP03-PUM promotor derivatives and subsequent conjugation to *S. coelicolor* M1146.**

**Figure S2: Test restriction of pCAP03-PUM $\Delta$ H $\Delta$ F**

**Figure S3: Test restriction of pCAP03-PUM**

**Table S1: Strains used in this study**

**Table S2: Primers used in this study**

**Figure S1:** Cloning procedure for construction of pCAP03-PUM and pCAP03-PUM promotor derivatives and subsequent conjugation to *S. coelicolor* M1146.

Exemplified for pCAP03-PUM $\Delta$ F\_ermE\*/tcp830: Result of the PCRs for A) *pumB* (1), *pumD* (2), *pumG* (3), *pumE* (4), *pumH - pumJ* (5), *pumK - pumL* (6), pCAP03\_part1 (8) and pCAP03\_part2 (9); B) Test restrictions of 9 colonies of assembled pCAP03-PUM $\Delta$ F with *HindIII/NotI* (left) and *HindIII/NcoI* (right); C) *in silico* simulation of the restriction pattern of pCAP03-PUM $\Delta$ F with *HindIII/NotI* (1) and *HindIII/NcoI* (2); D) Restriction of pGEM-teasy\_Apra-ermE\* (1) and pGEM-teasy\_Apra-tcp830 (2) with *EcoRI*; E) PCRs for the Apramycin resistance cassette – promoter fusions Apra-ermE\* (1) and Apra-tcp830 (2); F) Test PCRs for corroboration of correct integration of Apra-ermE\* (1) and Apra-tcp830 (2) into pCAP03-PUM; G) Test PCRs to verify the successful transfer of pCAP03-PUM-tcp830 (1) and pCAP03-PUM-ermE\* (3) into *S. coelicolor* M1146, with respective positive controls (2,4).

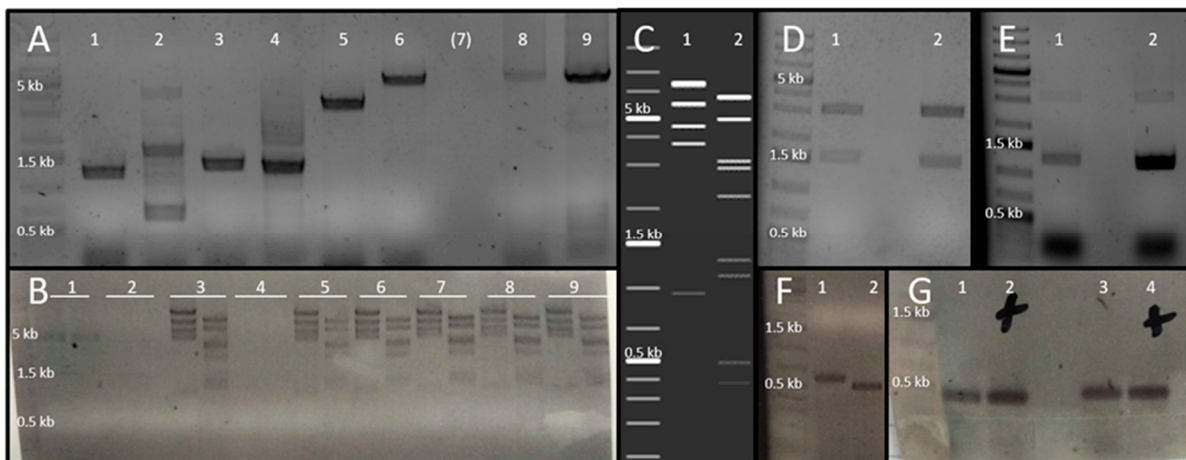

**Figure S2:** Test restriction of pCAP03-PUM $\Delta$ H $\Delta$ F with *HindIII/NotI* and *HindIII/NcoI* (left). *In silico* prediction of the restriction analysis (right).

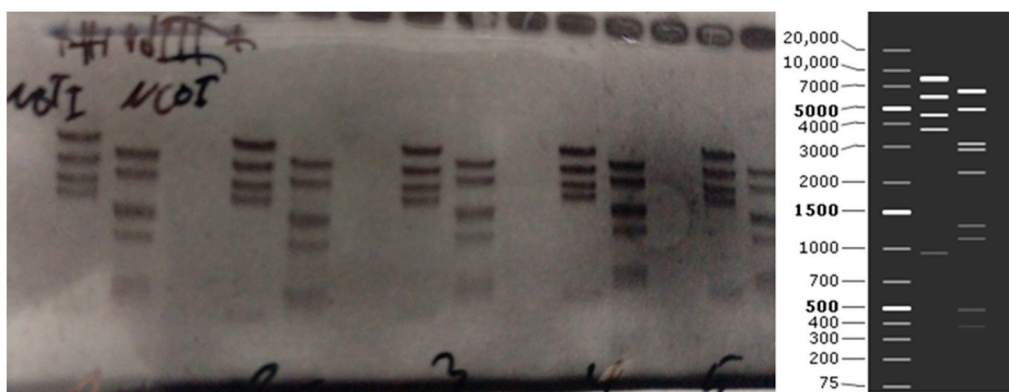

**Figure S3:** Test restriction of pCAP03-PUM with *NotI/HindIII* and *NcoI/HindIII* (left). *In silico* prediction of the restriction analysis (right).

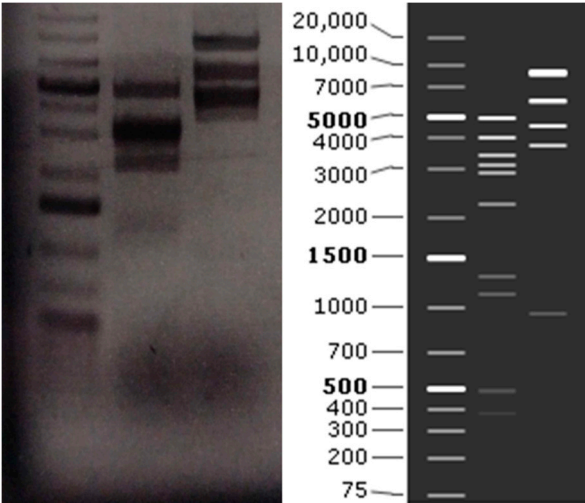

**Table S1:** Strains used in this study

| Strain                                                            | Genotype                                                                                                                                                                                                                             | Reference                           |
|-------------------------------------------------------------------|--------------------------------------------------------------------------------------------------------------------------------------------------------------------------------------------------------------------------------------|-------------------------------------|
| <i>Streptomyces</i> sp. DSM26212                                  | WT                                                                                                                                                                                                                                   | [1]                                 |
| <i>Streptomyces coelicolor</i> M1146                              | $\Delta$ act $\Delta$ red $\Delta$ cpk $\Delta$ cda                                                                                                                                                                                  | [10]                                |
| <i>E. coli</i> Top10                                              | F- mcrA $\Delta$ (mrr-hsdRMS-mcrBC)<br>$\phi$ 80lacZ $\Delta$ M15 $\Delta$ lacX74 nupG<br>recA1 araD139 $\Delta$ (ara-leu)7697<br>galE15 galK16 rpsL(StrR) endA1 $\lambda$ -                                                         | commercially available (invitrogen) |
| <i>E. coli</i> ET12567                                            | dam-13::Tn9, dcm-6, hsdM                                                                                                                                                                                                             | [17]                                |
| <i>E. coli</i> ET12567 + pUB307                                   | dam-13::Tn9, dcm-6, hsdM +<br>pUB307                                                                                                                                                                                                 | [17]                                |
| <i>E. coli</i> BW25113 + pKD46                                    | lacI+rrnBT14 $\Delta$ lacZWJ16 hsdR514<br>$\Delta$ araBADAH33 $\Delta$ rhaBADLD78<br>rph-1 $\Delta$ (araB-D)567 $\Delta$ (rhaD-<br>B)568 $\Delta$ lacZ4787(::rrnB-3)<br>hsdR514 rph-1 + pKD46                                        | [16]                                |
| <i>E. coli</i> XL1 Blue + pIJ773                                  | recA1 endA1 gyrA96 thi-1 hsdR17<br>supE44 relA1 lac + pIJ773                                                                                                                                                                         | [14]                                |
| <i>E. coli</i> XL1 Blue + pCAP03                                  | recA1 endA1 gyrA96 thi-1 hsdR17<br>supE44 relA1 lac + pCAP03                                                                                                                                                                         | [15]                                |
| <i>E. coli</i> XL1 Blue + pGEM-t easy-Apra-ermE*                  | recA1 endA1 gyrA96 thi-1 hsdR17<br>supE44 relA1 lac + pGEM-teasy-<br>Apra-ermE*                                                                                                                                                      | this work                           |
| <i>E. coli</i> XL1 Blue + pGEM-t easy-Apra-tcp830                 | recA1 endA1 gyrA96 thi-1 hsdR17<br>supE44 relA1 lac + pGEM-teasy-<br>Apra-tcp830                                                                                                                                                     | this work                           |
| <i>E. coli</i> Top10 + pCAP03-PUM $\Delta$ H $\Delta$ F           | F- mcrA $\Delta$ (mrr-hsdRMS-mcrBC)<br>$\phi$ 80lacZ $\Delta$ M15 $\Delta$ lacX74 nupG<br>recA1 araD139 $\Delta$ (ara-leu)7697<br>galE15 galK16 rpsL(StrR) endA1 $\lambda$ -<br>+ pCAP03-PUM $\Delta$ H $\Delta$ F                   | this work                           |
| <i>E. coli</i> Top10 + pCAP03-PUM $\Delta$ F                      | F- mcrA $\Delta$ (mrr-hsdRMS-mcrBC)<br>$\phi$ 80lacZ $\Delta$ M15 $\Delta$ lacX74 nupG<br>recA1 araD139 $\Delta$ (ara-leu)7697<br>galE15 galK16 rpsL(StrR) endA1 $\lambda$ -<br>+ pCAP03-PUM $\Delta$ F                              | this work                           |
| <i>E. coli</i> Top10 + pCAP03-PUM                                 | F- mcrA $\Delta$ (mrr-hsdRMS-mcrBC)<br>$\phi$ 80lacZ $\Delta$ M15 $\Delta$ lacX74 nupG<br>recA1 araD139 $\Delta$ (ara-leu)7697<br>galE15 galK16 rpsL(StrR) endA1 $\lambda$ -<br>+ pCAP03-PUM                                         | this work                           |
| <i>E. coli</i> BW25113 + pKD46 + pCAP03-PUM $\Delta$ H $\Delta$ F | lacI+rrnBT14 $\Delta$ lacZWJ16 hsdR514<br>$\Delta$ araBADAH33 $\Delta$ rhaBADLD78<br>rph-1 $\Delta$ (araB-D)567 $\Delta$ (rhaD-<br>B)568 $\Delta$ lacZ4787(::rrnB-3)<br>hsdR514 rph-1 + pKD46 + pCAP03-<br>PUM $\Delta$ H $\Delta$ F | this work                           |
| <i>E. coli</i> BW25113 + pKD46 + pCAP03-PUM $\Delta$ F            | lacI+rrnBT14 $\Delta$ lacZWJ16 hsdR514<br>$\Delta$ araBADAH33 $\Delta$ rhaBADLD78<br>rph-1 $\Delta$ (araB-D)567 $\Delta$ (rhaD-<br>B)568 $\Delta$ lacZ4787(::rrnB-3)<br>hsdR514 rph-1 + pKD46 + pCAP03-<br>PUM $\Delta$ F            | this work                           |
| <i>E. coli</i> BW25113 + pKD46 + pCAP03-PUM                       | lacI+rrnBT14 $\Delta$ lacZWJ16 hsdR514<br>$\Delta$ araBADAH33 $\Delta$ rhaBADLD78<br>rph-1 $\Delta$ (araB-D)567 $\Delta$ (rhaD-<br>B)568 $\Delta$ lacZ4787(::rrnB-3)<br>hsdR514 rph-1 + pKD46 + pCAP03-<br>PUM                       | this work                           |
| <i>E. coli</i> BW25113 + pCAP03-PUM $\Delta$ H $\Delta$ F_ermE*   | lacI+rrnBT14 $\Delta$ lacZWJ16 hsdR514<br>$\Delta$ araBADAH33 $\Delta$ rhaBADLD78<br>rph-1 $\Delta$ (araB-D)567 $\Delta$ (rhaD-<br>B)568 $\Delta$ lacZ4787(::rrnB-3)                                                                 | this work                           |

|                                                            |                                                                                                                                                   |           |
|------------------------------------------------------------|---------------------------------------------------------------------------------------------------------------------------------------------------|-----------|
|                                                            | hsdR514 rph-1- + pCAP03-PUMΔHΔF_ermE*                                                                                                             |           |
| <i>E. coli</i> BW25113 + pCAP03-PUMΔF_ermE*                | lacI+rrnBT14 ΔlacZWJ16 hsdR514 ΔaraBADAH33 ΔrhaBADLD78 rph-1 Δ(araB-D)567 Δ(rhaD-B)568 ΔlacZ4787(::rrnB-3) hsdR514 rph-1- + pCAP03-PUMΔF_ermE*    | this work |
| <i>E. coli</i> BW25113 + pCAP03-PUM_ermE*                  | lacI+rrnBT14 ΔlacZWJ16 hsdR514 ΔaraBADAH33 ΔrhaBADLD78 rph-1 Δ(araB-D)567 Δ(rhaD-B)568 ΔlacZ4787(::rrnB-3) hsdR514 rph-1- + pCAP03-PUM_ermE*      | this work |
| <i>E. coli</i> BW25113 + pCAP03-PUMΔHΔF_tcp830             | lacI+rrnBT14 ΔlacZWJ16 hsdR514 ΔaraBADAH33 ΔrhaBADLD78 rph-1 Δ(araB-D)567 Δ(rhaD-B)568 ΔlacZ4787(::rrnB-3) hsdR514 rph-1- + pCAP03-PUMΔHΔF_tcp830 | this work |
| <i>E. coli</i> BW25113 + pCAP03-PUMΔF_tcp830               | lacI+rrnBT14 ΔlacZWJ16 hsdR514 ΔaraBADAH33 ΔrhaBADLD78 rph-1 Δ(araB-D)567 Δ(rhaD-B)568 ΔlacZ4787(::rrnB-3) hsdR514 rph-1- + pCAP03-PUMΔF_tcp830   | this work |
| <i>E. coli</i> BW25113 + pCAP03-PUM_tcp830                 | lacI+rrnBT14 ΔlacZWJ16 hsdR514 ΔaraBADAH33 ΔrhaBADLD78 rph-1 Δ(araB-D)567 Δ(rhaD-B)568 ΔlacZ4787(::rrnB-3) hsdR514 rph-1- + pCAP03-PUM_tcp830     | this work |
| <i>E. coli</i> ET12567 + pCAP03                            | dam-13::Tn9, dcm-6, hsdM + pCAP03                                                                                                                 | this work |
| <i>E. coli</i> ET12567 + pCAP03-PUMΔHΔF_ermE*              | dam-13::Tn9, dcm-6, hsdM + pCAP03-PUMΔH_ermE*                                                                                                     | this work |
| <i>E. coli</i> ET12567 + pCAP03-PUMΔF_ermE*                | dam-13::Tn9, dcm-6, hsdM + pCAP03-PUMΔF_ermE*                                                                                                     | this work |
| <i>E. coli</i> ET12567 + pCAP03-PUM_ermE*                  | dam-13::Tn9, dcm-6, hsdM + pCAP03-PUM_ermE*                                                                                                       | this work |
| <i>E. coli</i> ET12567 + pCAP03-PUMΔHΔF_tcp830             | dam-13::Tn9, dcm-6, hsdM + pCAP03-PUMΔF_tcp830                                                                                                    | this work |
| <i>E. coli</i> ET12567 + pCAP03-PUMΔF_tcp830               | dam-13::Tn9, dcm-6, hsdM + pCAP03-PUMΔF_tcp830                                                                                                    | this work |
| <i>E. coli</i> ET12567 + pCAP03-PUM_tcp830                 | dam-13::Tn9, dcm-6, hsdM + pCAP03-PUM_tcp830                                                                                                      | this work |
| <i>Streptomyces coelicolor</i> M1146 pCAP03-PUMΔFΔH_ermE*  | Δact Δred Δcpk Δcda + pCAP03-ermE*-pumB,D,G,E,I,J,K,L,M,N                                                                                         | this work |
| <i>Streptomyces coelicolor</i> M1146 pCAP03-PUMΔF_ermE*    | Δact Δred Δcpk Δcda + pCAP03-ermE*-pumB,D,G,E,H,I,J,K,L,M,N                                                                                       | this work |
| <i>Streptomyces coelicolor</i> M1146 pCAP03-PUM_ermE*      | Δact Δred Δcpk Δcda + pCAP03-ermE*-pumB,D,G,E,F,H,I,J,K,L,M,N                                                                                     | this work |
| <i>Streptomyces coelicolor</i> M1146 pCAP03-PUMΔFΔH_tcp830 | Δact Δred Δcpk Δcda + pCAP03-tcp830-pumB,D,G,E,I,J,K,L,M,N                                                                                        | this work |
| <i>Streptomyces coelicolor</i> M1146 pCAP03-PUMΔF_tcp830   | Δact Δred Δcpk Δcda + pCAP03-tcp830-pumB,D,G,E,H,I,J,K,L,M,N                                                                                      | this work |
| <i>Streptomyces coelicolor</i> M1146 pCAP03-PUM_tcp830     | Δact Δred Δcpk Δcda + pCAP03-tcp830-pumB,D,G,E,F,H,I,J,K,L,M,N                                                                                    | this work |

**Table S2: Primers used in this study**

| Name           | Sequence (5' -> 3')                                                                                    |
|----------------|--------------------------------------------------------------------------------------------------------|
| pIJ773cass_f   | ATTCCGGGGATCCGTCGACC                                                                                   |
| ermEp1         | CCTCCCACCCGCTGGATCCTACCAACCGGCACGATTGTCCAGCCCACAACAGCATCGCGGTGCCACGT<br>GTGGACCGCGTCGGTCAGATCCTCCCCGCA |
| ermEp2         | TGCTGTTGTGGGCACAATCGTGCCGGTTGGTAGGATCCAGCGggtaggagg                                                    |
| tcp830         | CCTCCCAGATCTCTATCACTGATAGGGATCCTACCACTATCAATGATAGAGTAGCCAACAGCTGTAGG<br>CTGGAGCTGCTTC                  |
| pumB_f         | CATGGTATAAATAGTGGCGTGGATAGATACCTACGAGC                                                                 |
| pumB_r         | GTGGTCACCCCTCCTCATAACCGCCTCCGTCTCCA                                                                    |
| pumD_f         | CGGTATGAGGAGGGTGACCACGTGACGGGCACC                                                                      |
| pumD_r         | CGATCATGCAGGCCCTCCTCAGGTCCATTGACTGAGAG                                                                 |
| pumG_f         | GGAGGCGGCCTGCATGATCGGCGGCATGTGCGCT                                                                     |
| pumG_r         | GATGCCTCCACGTTTATCAGTCACAGGTCCGCAAGAGCCT                                                               |
| pumG+F_r       | TGTAAAGGCCTCCGTCACAGGTCCGCAAGAGCCT                                                                     |
| pumE_f         | CTGATAAACGTGGAGGCATCATGTGATTTCCCTGTCGTT                                                                |
| pumE_r         | CAGAACTCCCTCCTCACTCGGATCCGTCCCGGC                                                                      |
| pumEdH_r       | GACGCATCGGTACTCCCTCCTCACTCGGATCCGTCCCGGC                                                               |
| pumF_f         | CCTGTGACGGAGGCCTTTACAGTGTGGAACGTC                                                                      |
| pumF_r         | GATGCCTCCACGTTTATCAGTCATCGACCGCTCCGGGATC                                                               |
| pumI_f         | GGAGGGAGTACCGATGCGTCAGGGCTTCGATGA                                                                      |
| pumH_f         | CCGAGTGAGGAGGGAGTTCTGGTGATCATTGAGGGC                                                                   |
| pumJ_r         | GGACAGCCTCCCGGGACGCTCAGCGGCGGAGGACCAACT                                                                |
| pumK_f         | GCGTCCCGGGAGGCTGTCCATGGCGTTGCTGCTGCTCAA                                                                |
| pumN_r         | TATGTAGCTTTCGACATATTAGCCAACGGCCGGTAAC                                                                  |
| pCAP03_1f      | TGTCGAAAGCTACATATAAG                                                                                   |
| pCAP03_1r      | AACTGTTCCGCCAGGCTCAAG                                                                                  |
| pCAP03_2f      | CTTGAGCCTGGCGAACAGTT                                                                                   |
| pCAP03_2r      | GCCACTATTTATAACCATGGG                                                                                  |
| Rec_uni_f      | CCCTGTCGCCCTCCTATTGGCTTCCGATTATCTTCTTGGCAGCTCACGGTAACTGATG                                             |
| PUM_ermE*_rec  | GCCAGTCGGCCGGCTCGTAGGTATCTATCCACGCCACTATCCTCCTACCCGCTGGATCCT                                           |
| PUM_tcp830_rec | GCCAGTCGGCCGGCTCGTAGGTATCTATCCACGCCACTATCCTCCCAGATCTCTATCACT                                           |
| Pum_screen     | GCATGGGCGTTCATGCTGAC                                                                                   |
| ermE*_rectest  | ATCTTGACGGCTGGCGAGAG                                                                                   |
| tcp830_rectest | CAGCTGTTGGCTACTCTATC                                                                                   |
